# Supplementary material for: Enhanced Catalytic Activity of a New Nanobiocatalytic System Formed by the Adsorption of Cytochrome c on Pluronic Triblock Copolymer Stabilized MoS2 Nanosheets
Source: PubMed Central journal article supplement — ACS Omega. 2022 May 3;7(19):16593–604. doi: 10.1021/acsomega.2c00839 (PMC9118411; doi:10.1021/acsomega.2c00839), 2022-05-03
Supplement: ao2c00839_si_001.pdf [file ao2c00839_si_001.pdf]

## Supporting Information

### **Enhanced Catalytic Activity of a New Nano-Biocatalytic System Formed by the Adsorption of Cytochrome c on a Pluronic Triblock Copolymer Stabilized MoS<sub>2</sub> Nanosheets**

Anu Maria Chittilappilly Devassy, Adithya Kamalakshan, Nidhi Anilkumar Jamuna, Roselin Ansilda and Sarthak Mandal\*

Department of Chemistry, National Institute of Technology, Tiruchirappalli, Tamil Nadu  
620015, India

Address for Correspondence:

\*Email: [smandal@nitt.edu](mailto:smandal@nitt.edu) and [sarthakmandal@gmail.com](mailto:sarthakmandal@gmail.com)

Department of Chemistry  
National Institute of Technology  
Tiruchirappalli, Tamil Nadu 620015

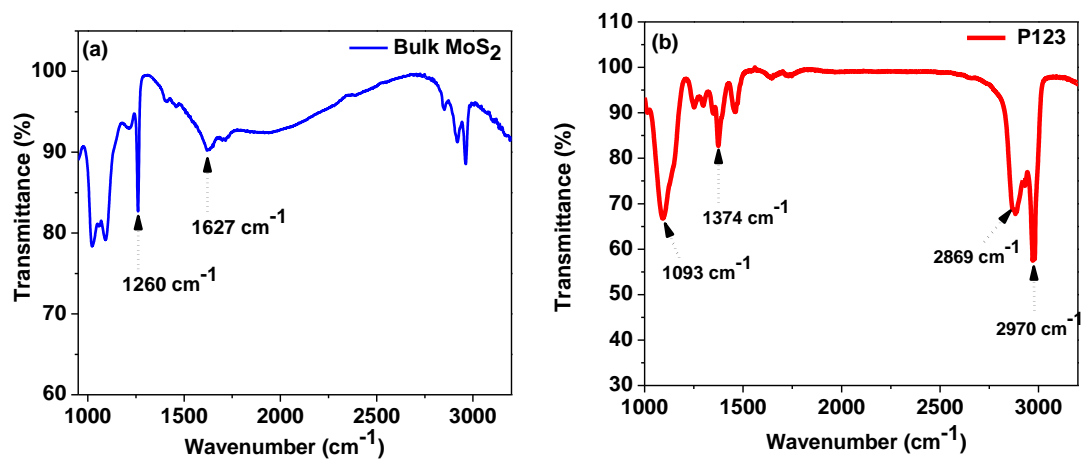

**Figure S1.** FTIR spectra of (a) bulk MoS<sub>2</sub> material and (b) pure P123 polymer.

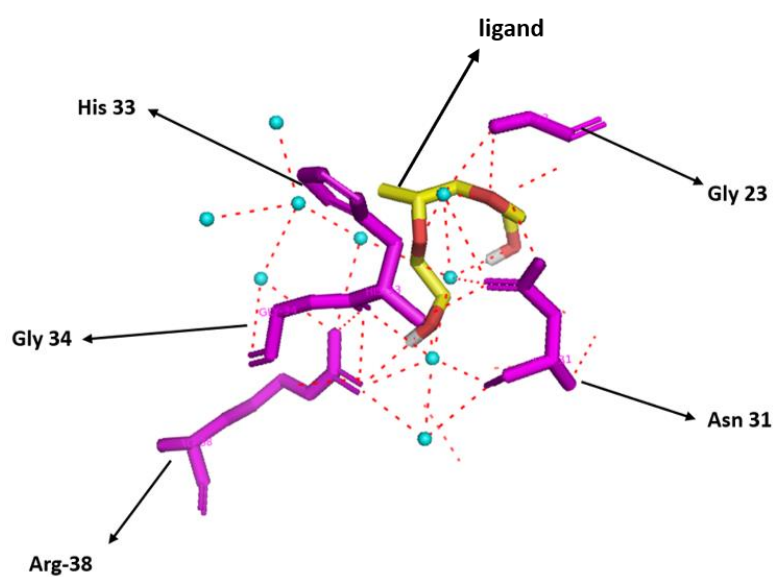

**Figure S2.** Polar interactions between Cyt c (from horse heart) and 2-[2-(2-hydroxyethoxy)propoxy]ethanol

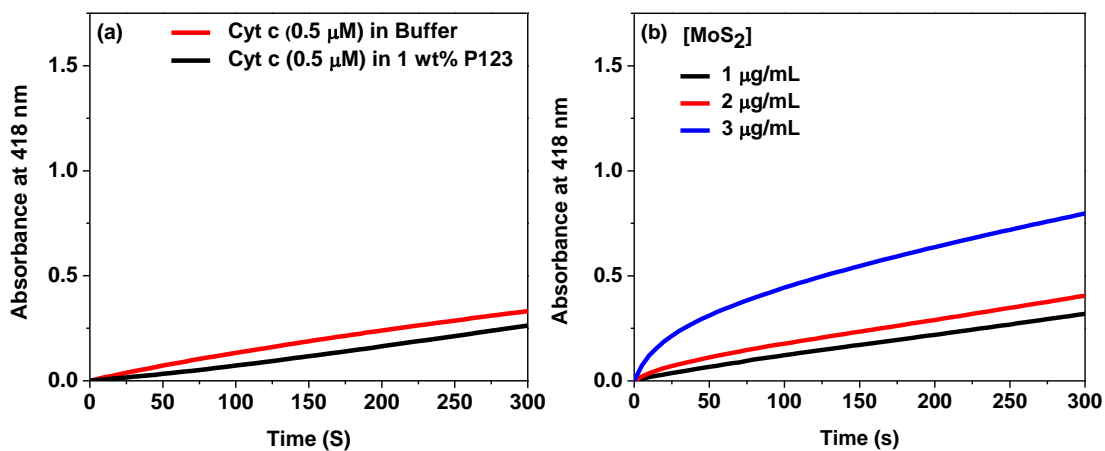

**Figure S3.** (a) Peroxidase-like catalytic activity of 0.5  $\mu\text{M}$  Cyt c (without  $\text{MoS}_2$  nanosheets) in pH 7.1 phosphate buffer solution in the absence and presence of 1% (w/V) P123 solution. (b) Peroxidase-like catalytic activity of  $\text{MoS}_2$  nanosheets (without Cyt c) at different concentration (1, 2, and 3  $\mu\text{g/mL}$ ) monitored by the time-dependent absorbance changes of ABTS (oxidized form) formed in the solution. In both the experiments, the concentrations of ABTS and  $\text{H}_2\text{O}_2$  are 0.5 mM and 5 mM respectively.

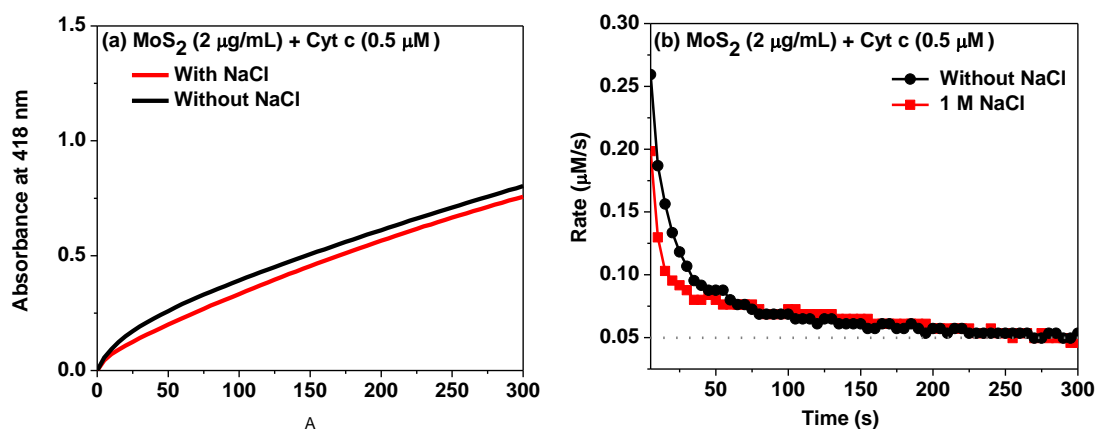

**Figure S4.** (a) Effect of ionic strength on peroxidase-like catalytic activity of Cyt c- $\text{MoS}_2$  nano-biohybrid system studied in 10 mM phosphate buffer solution at pH 7.1. (b) Plot of the catalytic reaction rate vs. time in the absence and presence of 1 M NaCl.

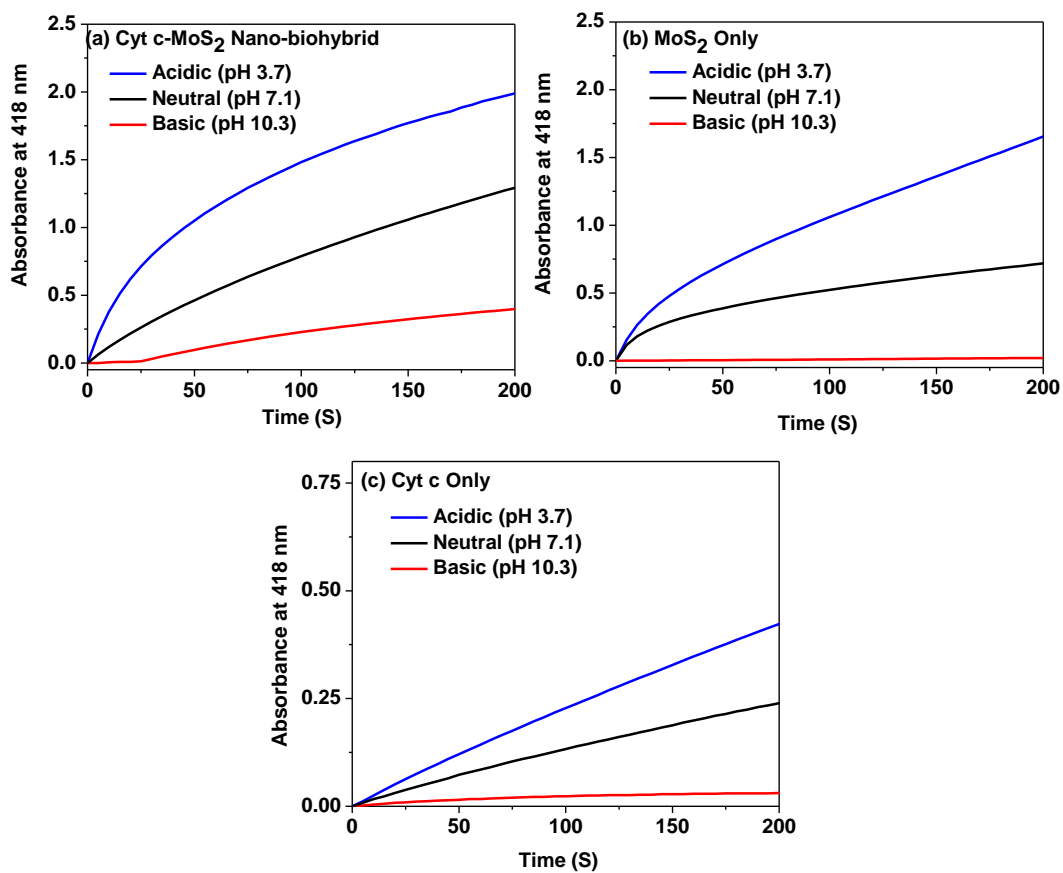

**Figure S5** (a) Effect of pH (pH 3.7, 7.1, and 10.3) on peroxidase-like catalytic activity of (a) Cyt c-MoS<sub>2</sub> nano-biohybrid (3 μg/mL MoS<sub>2</sub> + 0.5 μM Cyt c), (b) MoS<sub>2</sub> nanosheets (3 μg/mL) only (without Cyt c) and (c) Cyt c (0.5 μM) only (without MoS<sub>2</sub>) systems. In all the experiments, the concentrations of ABTS and H<sub>2</sub>O<sub>2</sub> are 0.5 mM and 5 mM respectively.

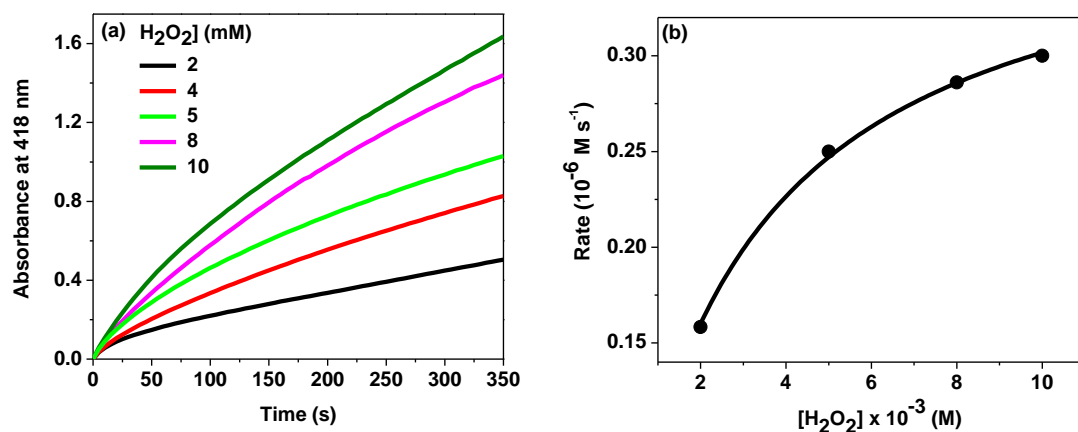

**Figure S6.** (a) Steady-state kinetic assay of Cyt *c*-MoS<sub>2</sub> nano-biohybrid (0.5 μM Cyt *c* + 3 μg/mL MoS<sub>2</sub>) at varying concentration of H<sub>2</sub>O<sub>2</sub> shown by monitoring the time-dependent absorbance changes of ABTS radical (oxidized form) at 418 nm. The ABTS concentration was kept constant at 0.5 mM. (b) Initial peroxidase reaction rates (v) for Cyt *c*-MoS<sub>2</sub> nano-biohybrid with varying H<sub>2</sub>O<sub>2</sub> concentration.

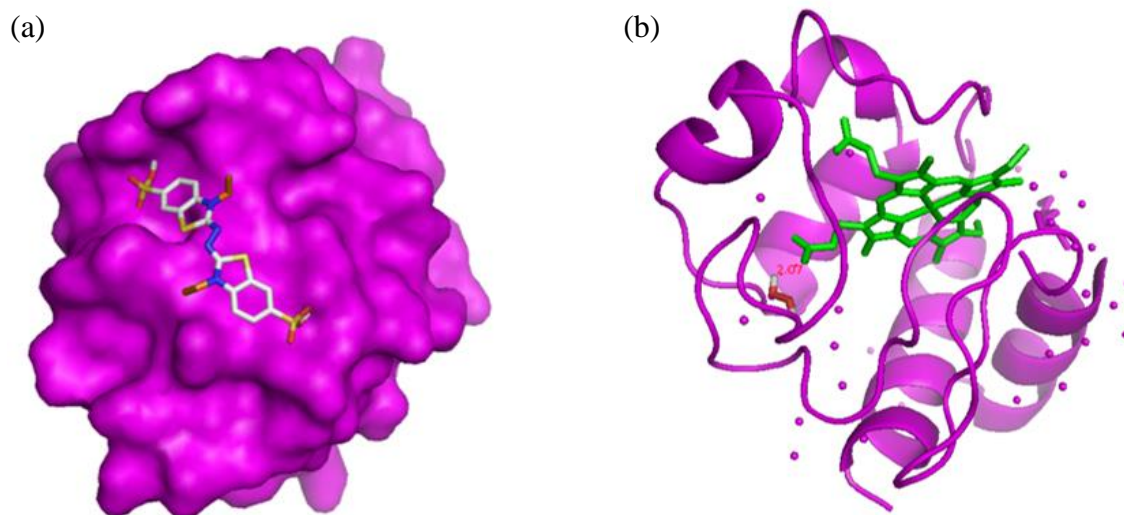

**Figure S7.** (a) ABTS docks on the surface of protein and (b) H<sub>2</sub>O<sub>2</sub> docks near the heme center of protein

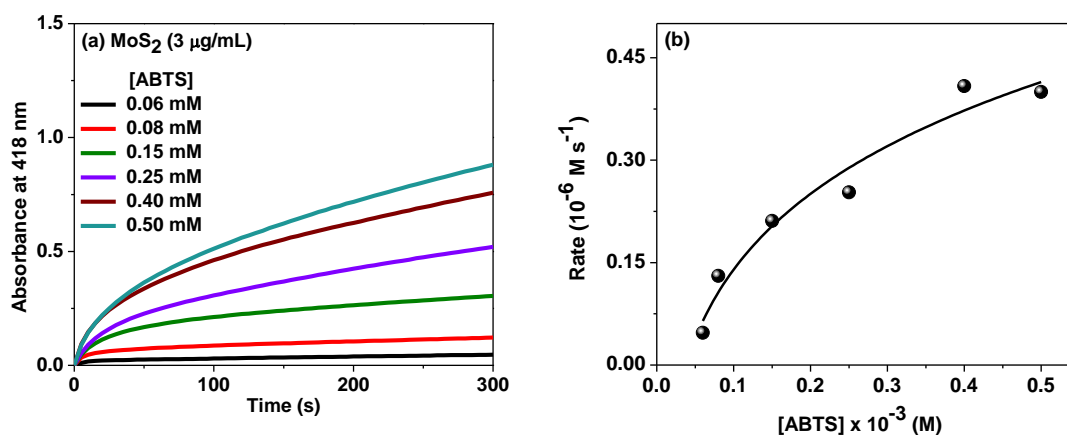

**Figure S8.** Control experiment using MoS<sub>2</sub> only without Cyt *c* as catalyst. (a) Steady-state kinetic assay of MoS<sub>2</sub> (3 µg/mL) at varying concentration of ABTS substrate shown by monitoring the time-dependent absorbance changes of ABTS radical (oxidized form) at 418 nm. The H<sub>2</sub>O<sub>2</sub> concentration was kept constant at 5 mM. (b) Initial peroxidase reaction rates (v) for MoS<sub>2</sub> catalyst with increasing concentration of ABTS.

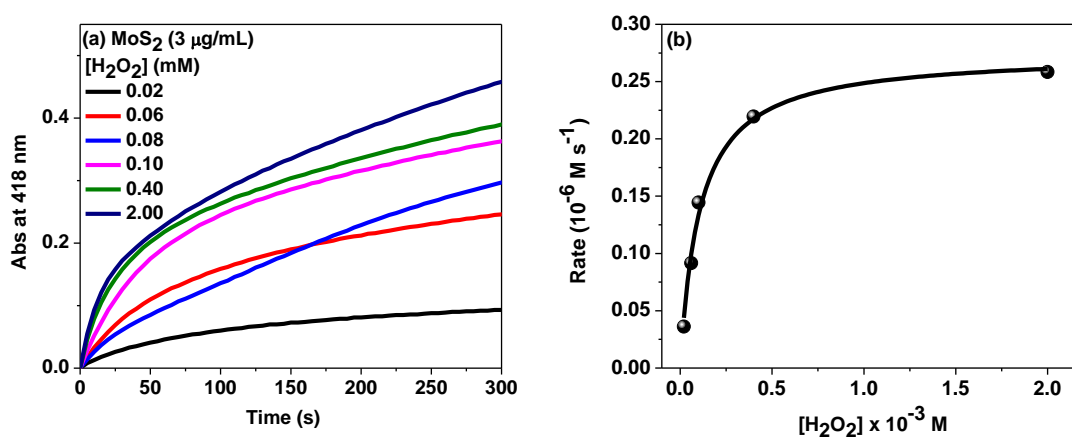

**Figure S9.** Control experiment using MoS<sub>2</sub> only without Cyt *c* as catalyst. (a) Steady-state kinetic assay of MoS<sub>2</sub> (3 µg/mL) at varying concentration of H<sub>2</sub>O<sub>2</sub> substrate shown by monitoring the time-dependent absorbance changes of ABTS radical (oxidized form) at 418 nm. The ABTS concentration was kept constant at 0.5 mM. (b) Initial peroxidase reaction rates (v) for MoS<sub>2</sub> catalyst with increasing concentration of H<sub>2</sub>O<sub>2</sub>.

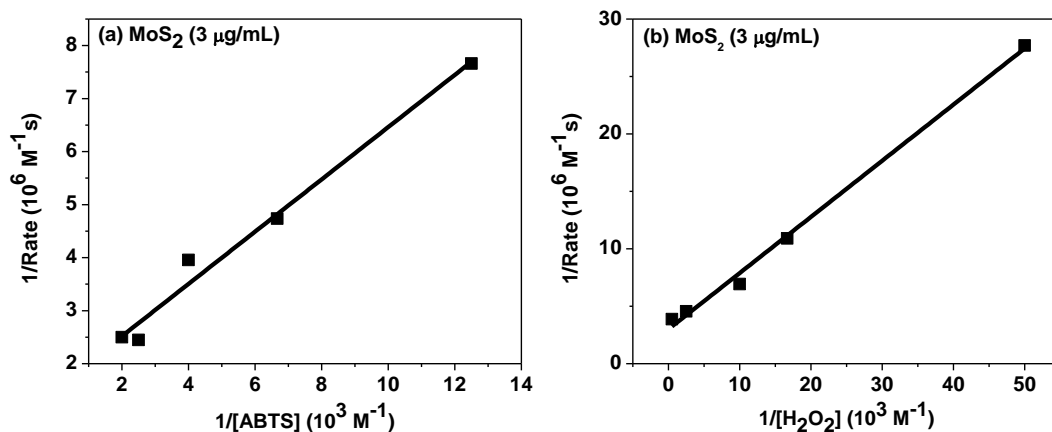

**Figure S10.** Double reciprocal plots of the kinetic assays of the MoS<sub>2</sub> (3 µg/mL) only system (a) at varying concentration of the ABTS substrate while keeping the H<sub>2</sub>O<sub>2</sub> concentration fixed at 5 mM, and (b) at varying concentration of H<sub>2</sub>O<sub>2</sub> while keeping the ABTS concentration fixed at 0.5 mM. These plots were used to calculate the catalytic Michaelis-Menten kinetic parameters.

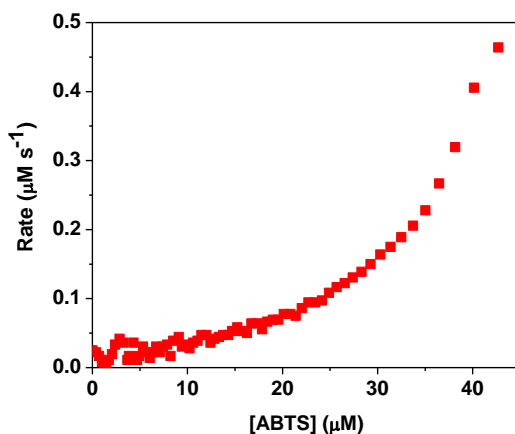

**Figure S11.** The rate of reaction progress as a function of the consumption of the ABTS substrate. The plot is obtained by combining the reaction rate vs. time plot and ABTS substrate concentration consumption vs. time plot. In the plot the reaction progress is read from right (maximum substrate concentration i.e., minimum product concentration) to left (minimum substrate concentration i.e., maximum product concentration). [Initial concentrations of ABTS = 1 mM, H<sub>2</sub>O<sub>2</sub> = 5 mM, and Cyt c-MoS<sub>2</sub> (0.5 µM Cyt c + 3µg/mL MoS<sub>2</sub>)]

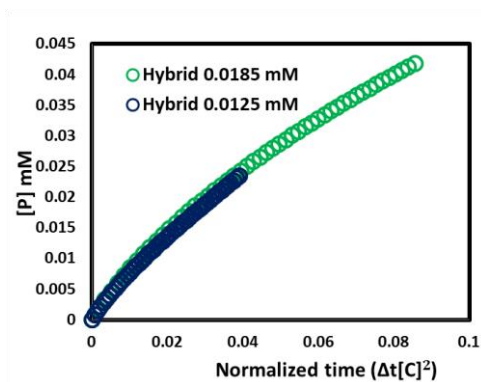

**Figure S12:** Variable-time-normalization (VTNA) analysis for the order of the reaction with respect to the Cyt *c* – MoS<sub>2</sub> nano-biohybrid catalyst. For both the data sets the initial concentrations of the substrates (ABTS = 0.5 mM and H<sub>2</sub>O<sub>2</sub> = 5 mM) are same.
